# Supplementary material for: SATB2 drives glioblastoma growth by recruiting CBP to promote FOXM1 expression in glioma stem cells
Source: PubMed Central journal article supplement (PMC7721366; doi:10.15252/emmm.202012291), 2020-10-30
Supplement: EMMM-12-e12291-s001.pdf [file EMMM-12-e12291-s001.pdf]

# **SATB2 Drives Glioblastoma Growth by Recruiting CBP to Promote FOXM1**

## **Expression in Glioma Stem Cells**

Weiwei Tao, Aili Zhang, Kui Zhai, Zhi Huang, Haidong Huang, Wenchao Zhou, Qian Huang, Xiaoguang Fang, Briana C. Prager, Xiuxing Wang, Qiulian Wu, Andrew E. Sloan, Manmeet S. Ahluwalia, Justin D. Lathia, Jennifer S. Yu, Jeremy N. Rich, and Shideng Bao

## **Appendix**

**Appendix Figure S1**

**Appendix Figure S2**

**Appendix Figure S3**

**Appendix Figure S4**

**Appendix Figure S5**

**Appendix Figure S6**

**Appendix Figure S7**

**Appendix Figure S8**

**Appendix Table S1**

**Appendix Table S2**

**Appendix Table S3**

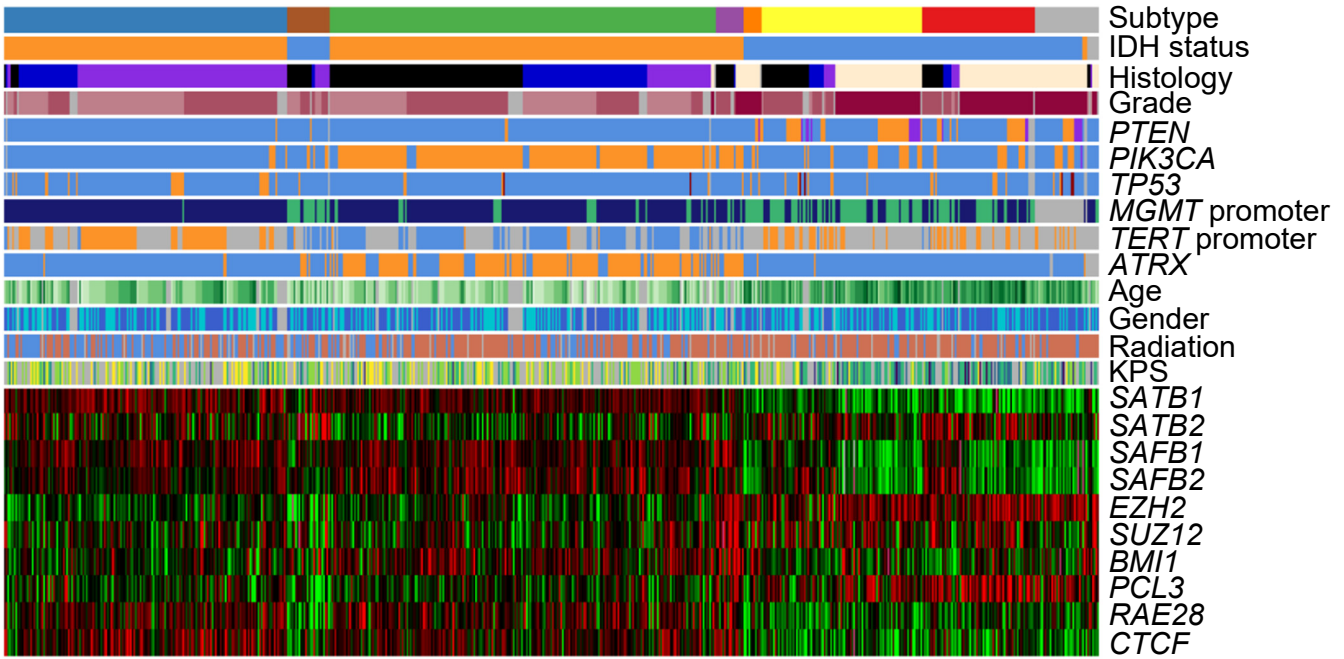

Subtype

- Codel
- PA-like
- G-CIMP high
- G-CIMP low
- LGm6-GBM
- Classic-like
- Mesenchymal-like

MGMT promoter

- Methylated
- Unmethylated

Histology

- Astrocytoma
- Oligoastrocytoma
- Oligodendroglioma
- Glioblastoma

Genes

- WT
- Mutant
- Amp
- Homozygous del

Grade

- Grade II
- Grade III
- Grade IV

Gender

- Female
- Male

Radiation

- NA

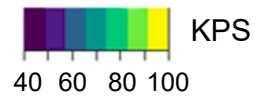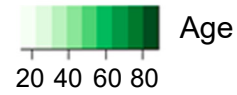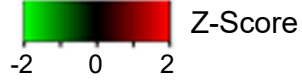

## **Appendix Figure S1. SATB2 is enriched in human GBMs.**

Microarray and whole exome data as well as clinical phenotype were aggregated from TCGA GBM and low-grade glioma (LGG) databases to visualize the expression pattern of nuclear matrix-associated proteins (NMPs). Codel, codeletion of chromosomes 1p and 19q; PA-like, pilocytic astrocytoma-like; CIMP, glioma-CpG island methylator phenotype; LGm6-GBM, a subgroup of glioma enriched for histologic lowgrade gliomas that also contains a subset of tumors with GBM-defining histologic criteria; KPS, Karnofsky performance status.

**A**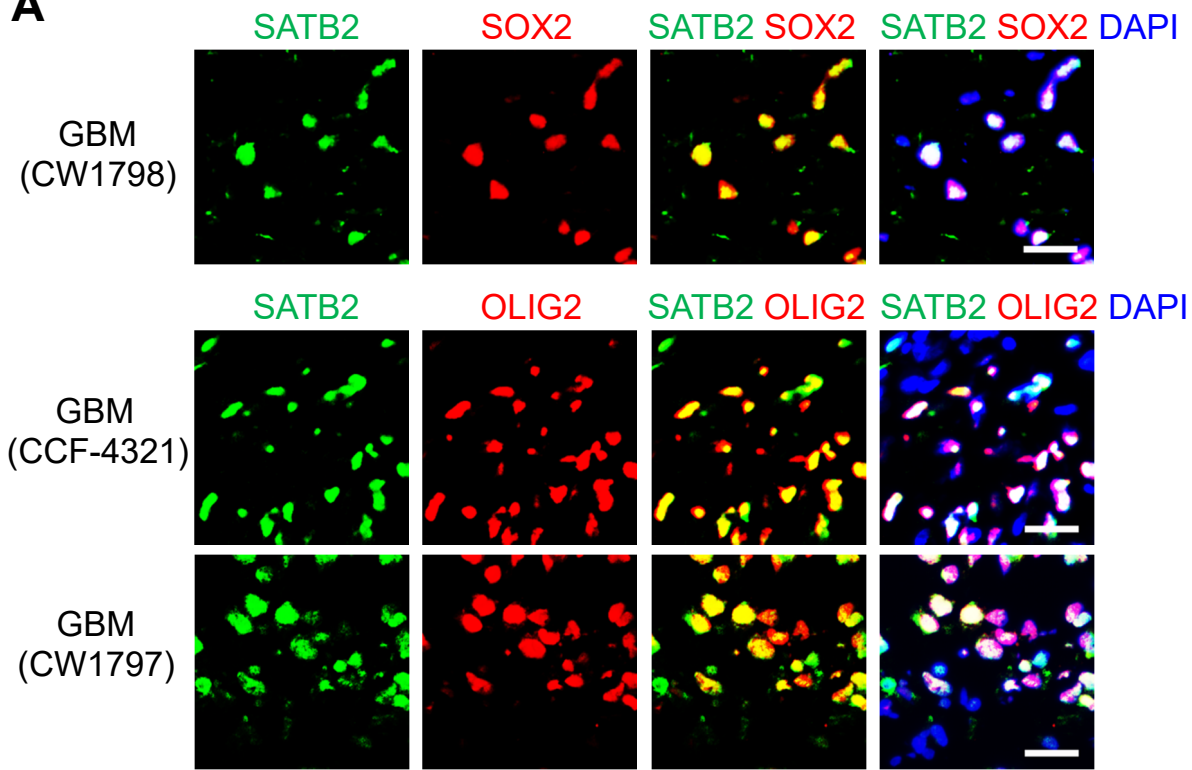**B**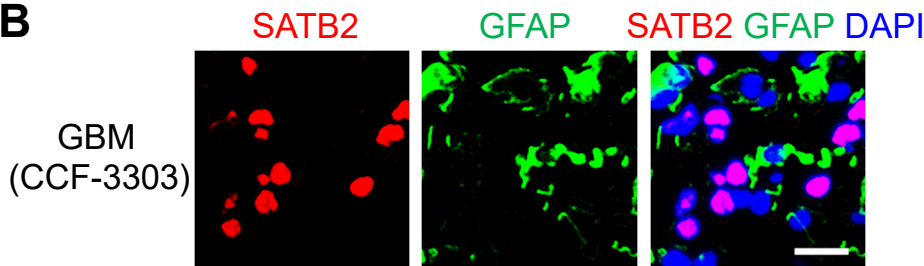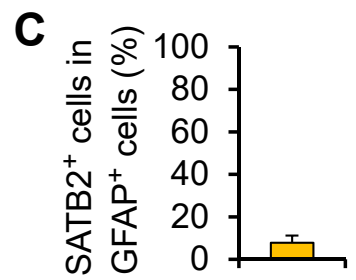**D**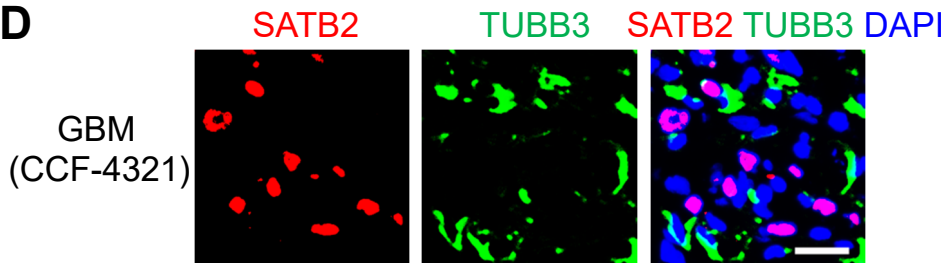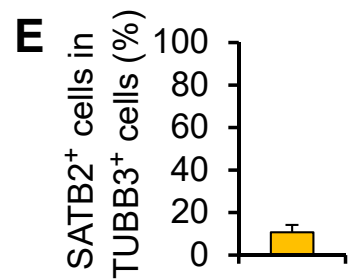**F**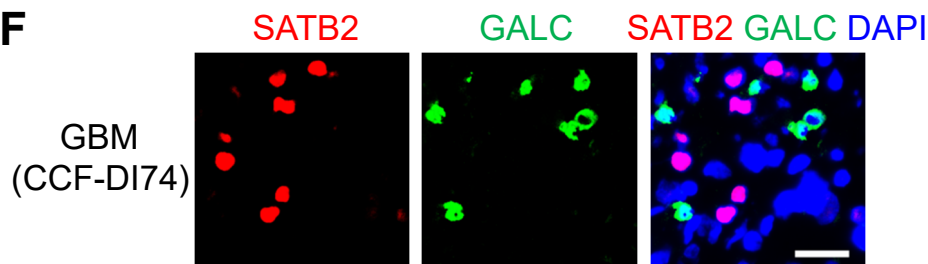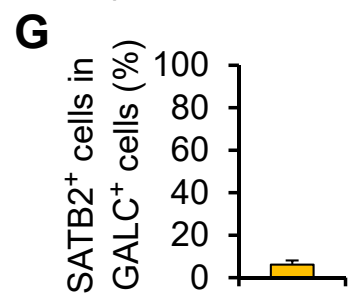**H**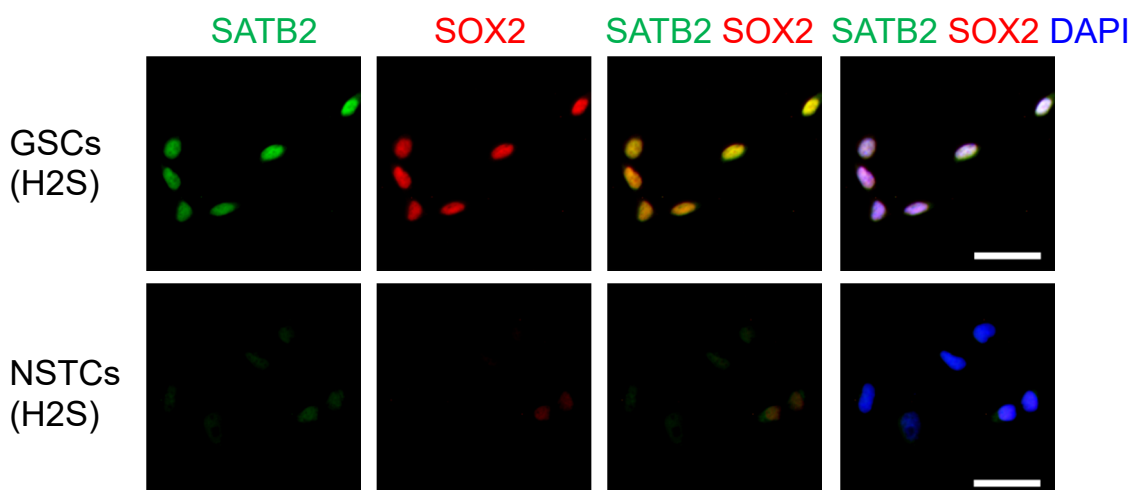

## **Appendix Figure S2. SATB2 is enriched in GSCs.**

A. Immunofluorescence of SATB2 (green) and SOX2 or OLIG2 (red) on frozen tissue sections of human GBM surgical specimens. Scale bar, 25  $\mu\text{m}$ .

B. Immunofluorescence of SATB2 (red) and the astrocyte marker GFAP (green) on frozen tissue sections of human GBM surgical specimens. Scale bar, 25  $\mu\text{m}$ .

C. Quantification of the fraction of SATB2<sup>+</sup> cells in GFAP<sup>+</sup> cells in human GBMs. n=3 different GBMs.

D. Immunofluorescence of SATB2 (red) and the neuron marker TUBB3 (green) on frozen tissue sections of human GBM surgical specimens. Scale bar, 25  $\mu\text{m}$ .

E. Quantification of the fraction of SATB2<sup>+</sup> cells in TUBB3<sup>+</sup> cells in human GBMs. n=3 different GBMs.

F. Immunofluorescence of SATB2 (red) and the oligodendrocyte marker GALC (green) on frozen tissue sections of human GBM surgical specimens. Scale bar, 25  $\mu\text{m}$ .

G. Quantification of the fraction of SATB2<sup>+</sup> cells in GALC<sup>+</sup> cells in human GBMs. n=3 different GBMs.

H. Immunofluorescence of SATB2 (green) and SOX2 (red) in H2S GSCs and matched NSTCs. Scale bar, 50  $\mu\text{m}$ .

Data information: Data are represented as mean  $\pm$  SD.

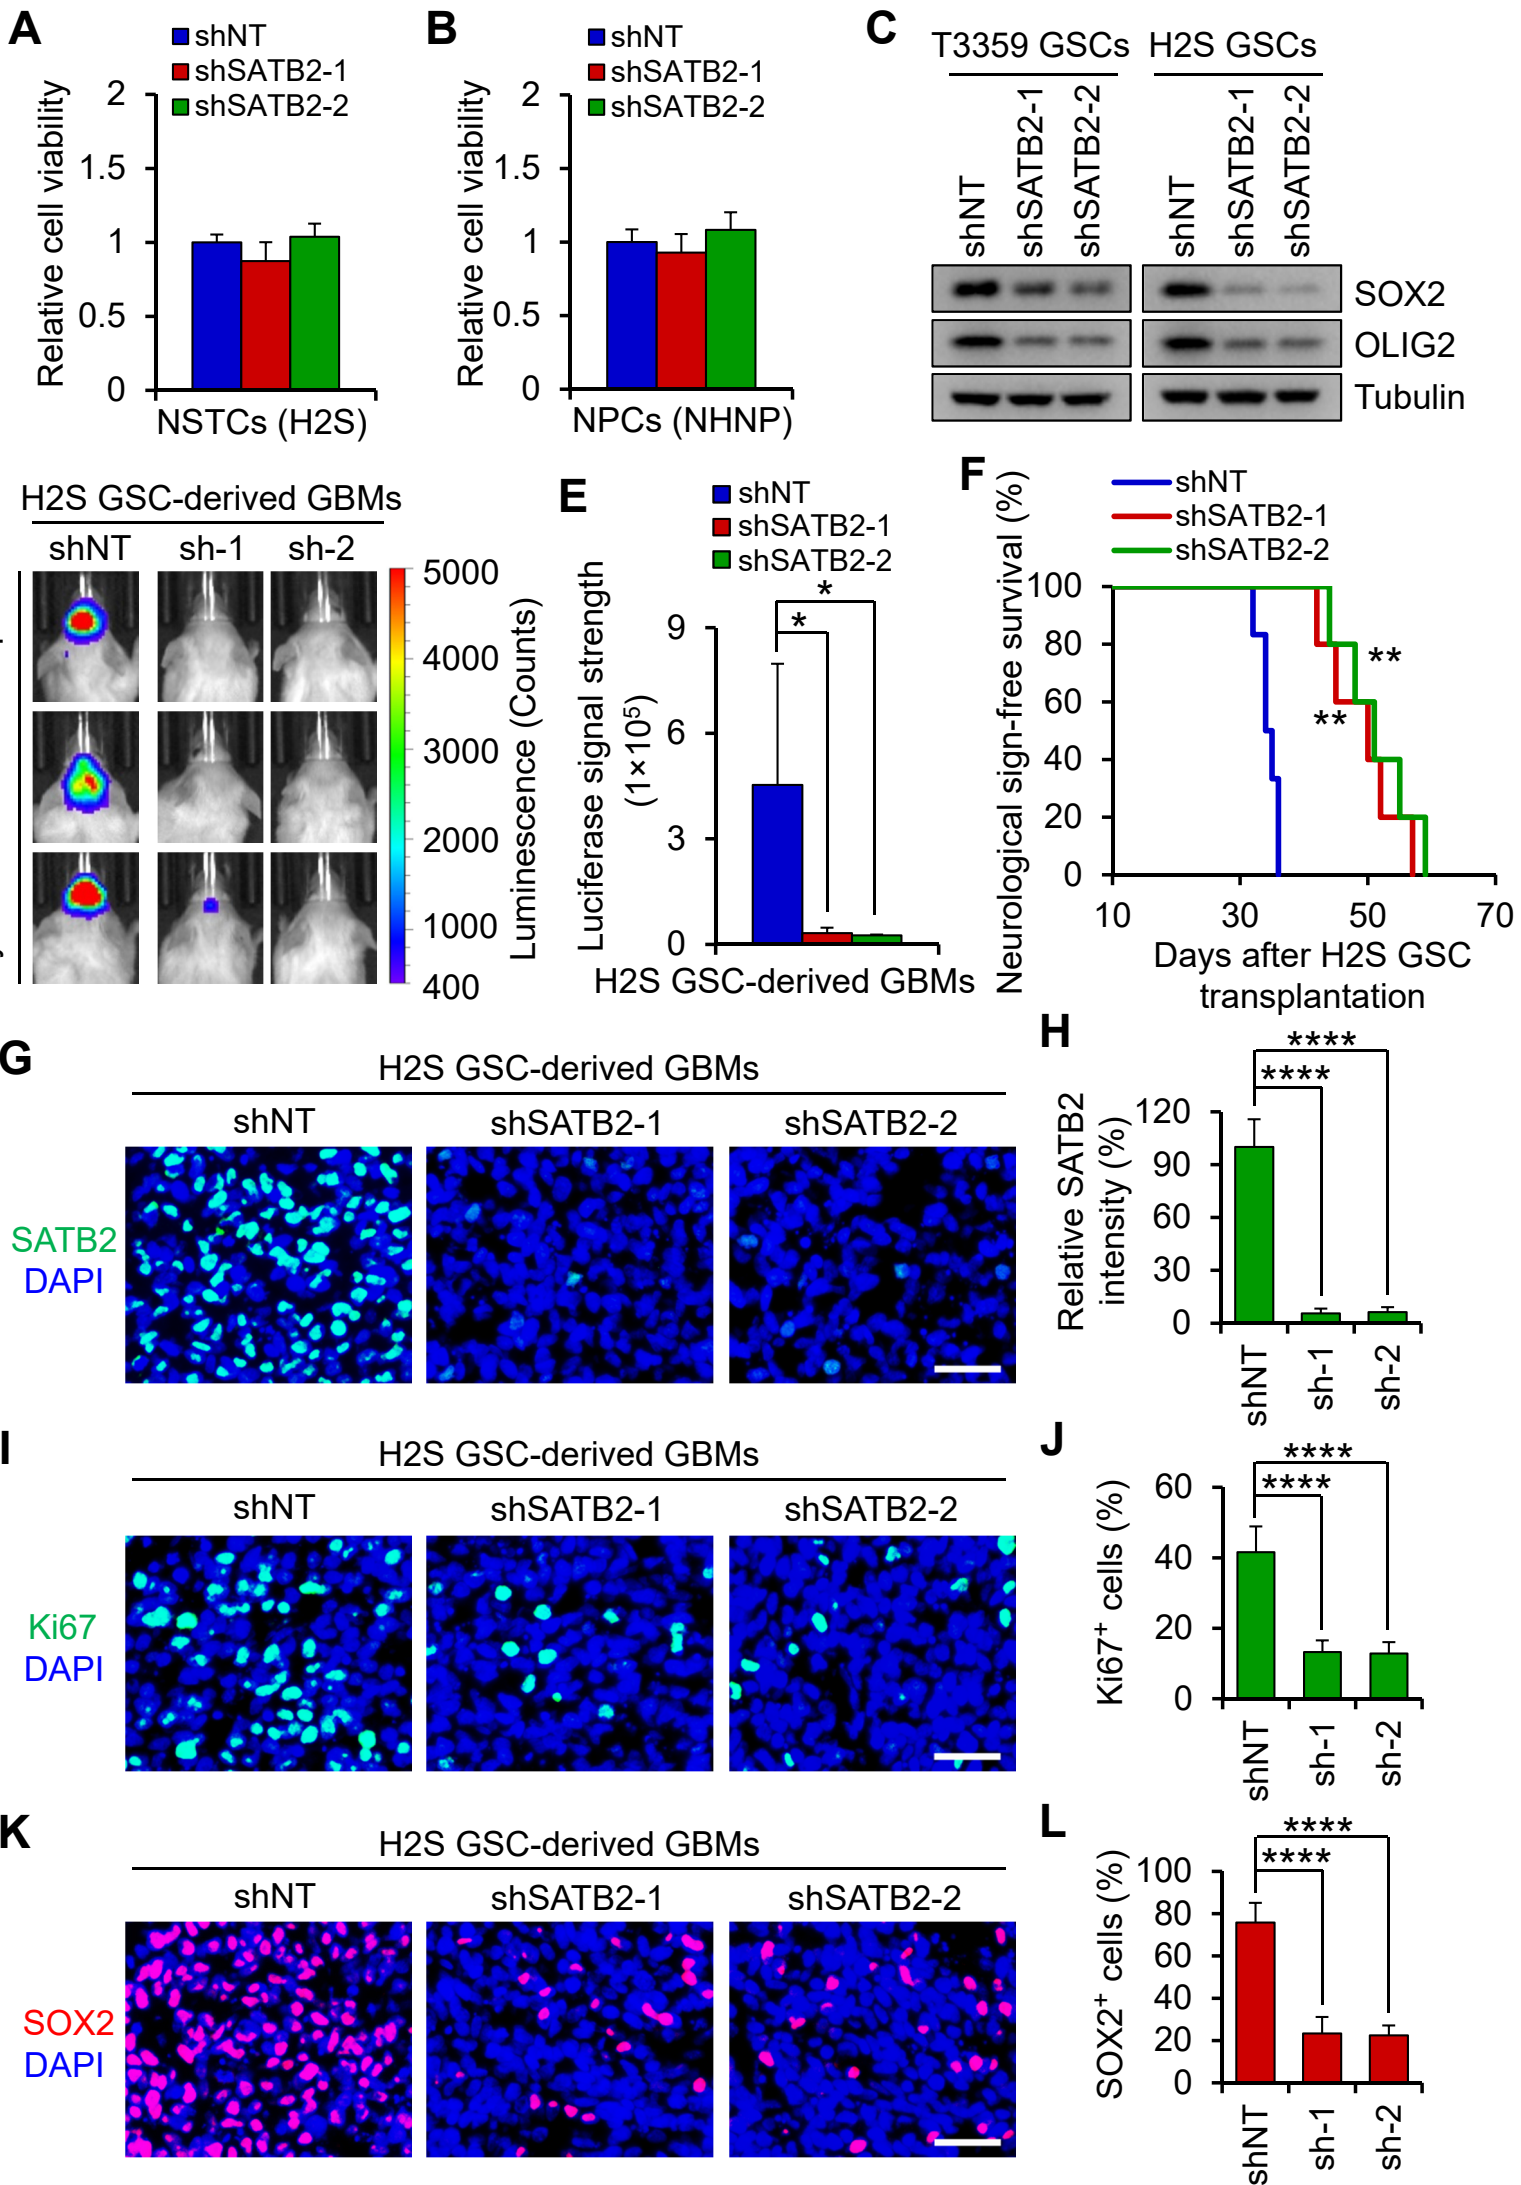

### **Appendix Figure S3. Disrupting SATB2 suppressed GSC proliferation and GBM growth.**

A. Cell viability of H2S NSTCs expressing shNT or shSATB2 at day 3 after cell seeding (n=5).

B. Cell viability of NHNP NPCs expressing shNT or shSATB2 at day 3 after cell seeding (n=5).

C. Immunoblot analysis of SOX2 and OLIG2 expression in GSCs transduced with shNT or shSATB2.

D. Bioluminescent images of the GBM xenografts derived from the luciferase-labeled H2S GSCs expressing shNT or shSATB2. Representative images on day 21 after transplantation are shown (n=5 mice per group).

E. Quantification of the bioluminescence of xenografts derived from the luciferase-labeled H2S GSCs expressing shNT or shSATB2 at day 21 posttransplantation (n=5 mice per group).

F. Kaplan-Meier survival curves of mice intracranially implanted with H2S GSCs expressing shNT or shSATB2 (shNT: n=6 mice; shSATB2-1 or shSATB2-2: n=5 mice). Median survival: shNT, 34.5 days; shSATB2-1, 50 days; shSATB2-2, 51 Days.

G. Immunofluorescence of SATB2 (Green) in GBM xenografts derived from H2S GSCs expressing shNT or shSATB2 (n=5 tumors per group). Scale bar: 40  $\mu$ m.

H. Quantification of SATB2 intensity in xenografts derived from H2S GSCs expressing shNT or shSATB2 (n=5 tumors per group).

I. Immunofluorescence of Ki67 (Green) in tumor xenografts derived from H2S GSCs expressing shNT or shSATB2 (n=5 tumors per group). Scale bar: 40  $\mu$ m.

J. Quantification of Ki67 positive cells in xenografts derived from H2S GSCs expressing shNT or shSATB2 (n=5 tumors per group).

K. Immunofluorescence of SOX2 (Red) in xenografts derived from H2S GSCs expressing shNT or shSATB2 (n=5 tumors per group). Scale bar: 40  $\mu$ m.

L. Quantification of SOX2 positive cells in xenografts derived from H2S GSCs expressing shNT or shSATB2 (n=5 tumors per group).

Data information: Data are shown as mean  $\pm$  SD. \* $p$ <0.5, \*\* $p$ <0.01, \*\*\*\* $p$ <0.0001 compared with shNT, one way ANOVA analysis followed by Tukey's test (A, B, H, J and L), Kruskal–Wallis test followed by Dunn's test (E), or log-rank test (F). Exact  $p$  values are reported in Appendix Table S3.

**A**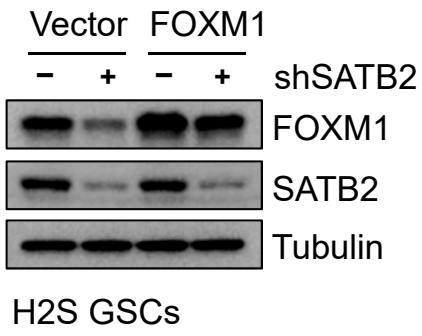**B**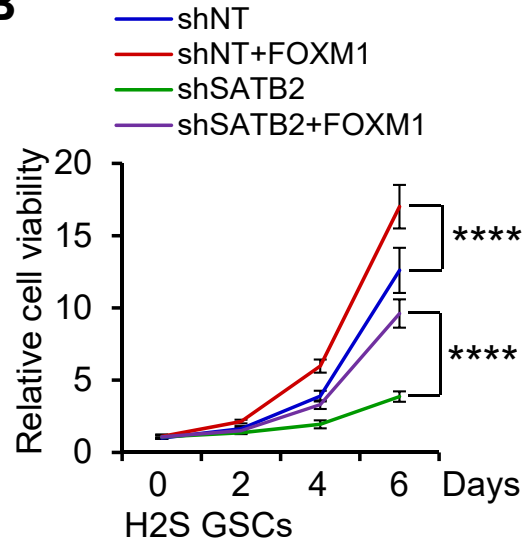**C**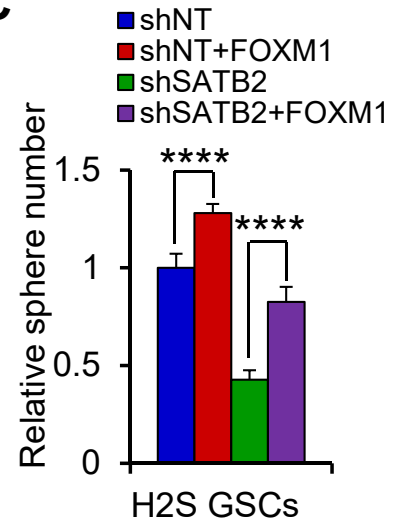**D**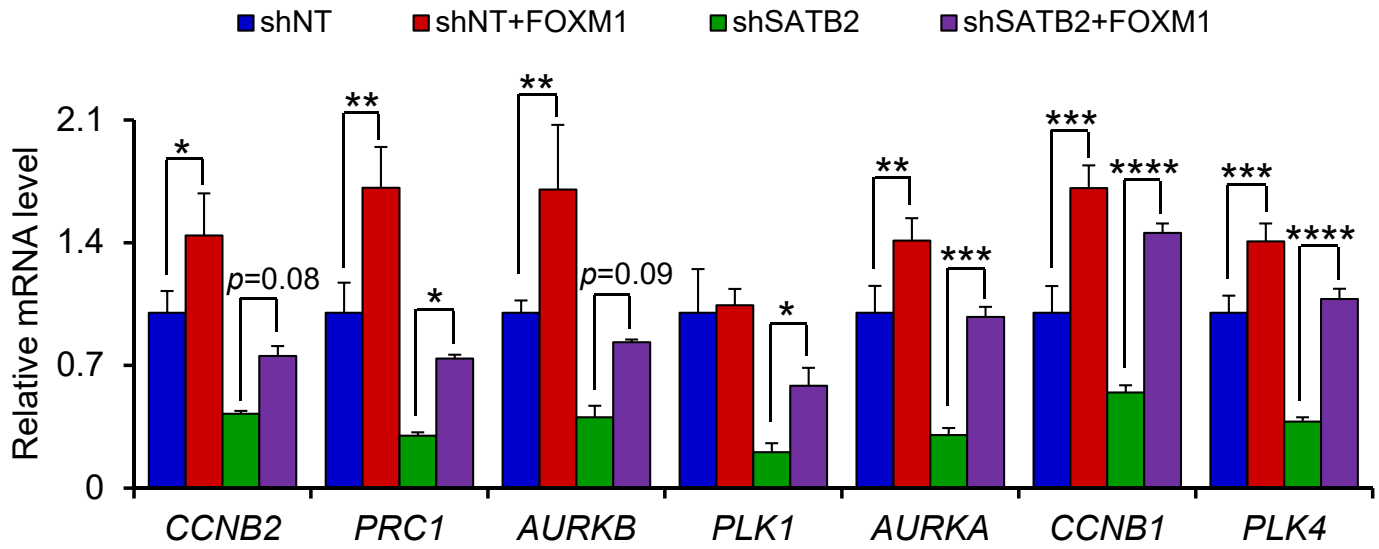**E**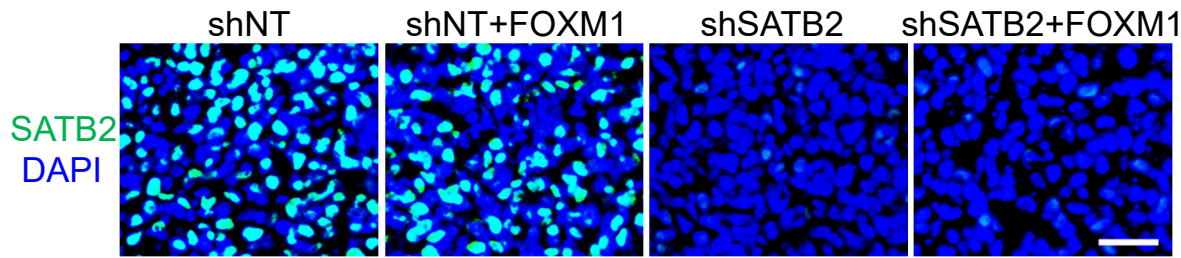**F**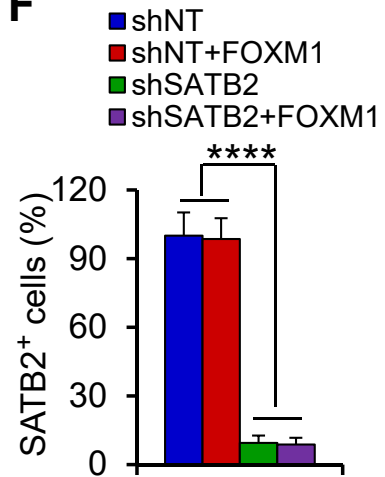



**Appendix Figure S4. Ectopic expression of FOXM1 rescued the decreased GSC proliferation caused by SATB2 disruption.**

A. Immunoblot analysis of FOXM1 and SATB2 expression in H2S GSCs transduced with FOXM1 or vector control in combination with shNT or shSATB2.

B. Cell viability assays of H2S GSCs transduced with FOXM1 or vector control in combination with shNT or shSATB2 (n=5).

C. Tumorsphere number of H2S GSCs transduced with FOXM1 or vector control in combination with shNT or shSATB2 (n=5).

D. qPCR analysis of FOXM1 downstream targets in H2S GSCs transduced with FOXM1 or vector control in combination with shNT or shSATB2 (n=3). Ectopic expression of FOXM1 in GSCs expressing shSATB2 restored the expression of proliferative-related genes.

E. Immunofluorescence of SATB2 (Green) in xenografts derived from T3359 GSCs transduced with FOXM1 or vector control in combination with shNT or shSATB2 (n=5 tumors per group). Scale bar: 40  $\mu$ m.

F. Quantification of SATB2 intensity in xenografts derived from T3359 GSCs transduced with FOXM1 or vector control in combination with shNT or shSATB2 (n=5 tumors per group).

Data information: Data are shown as mean  $\pm$  SD. \* $p$ <0.5, \*\* $p$ <0.01, \*\*\* $p$ <0.001, \*\*\*\* $p$ <0.0001, two way ANOVA analysis followed by Tukey's test (B) or one way ANOVA analysis followed by Tukey's test (C, D and F). Exact  $p$  values are reported in Appendix Table S3.

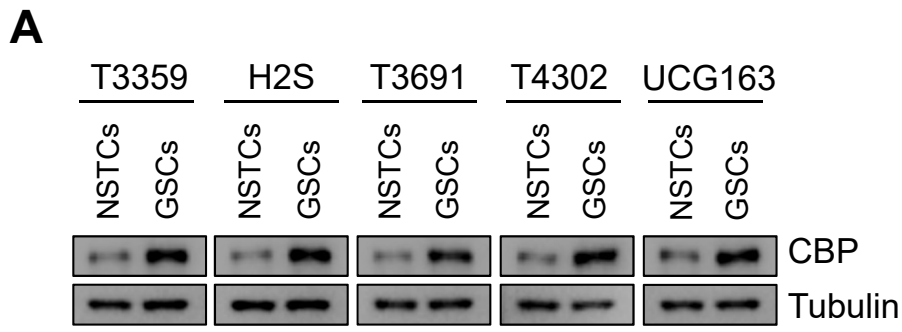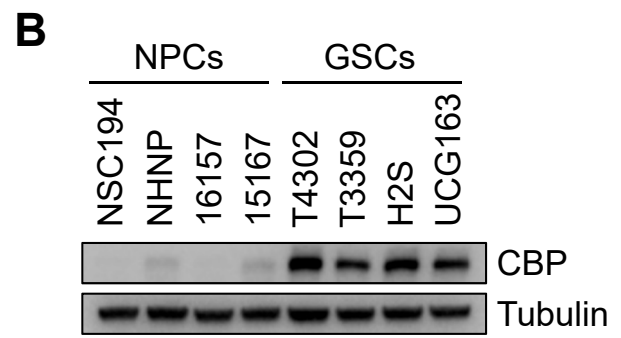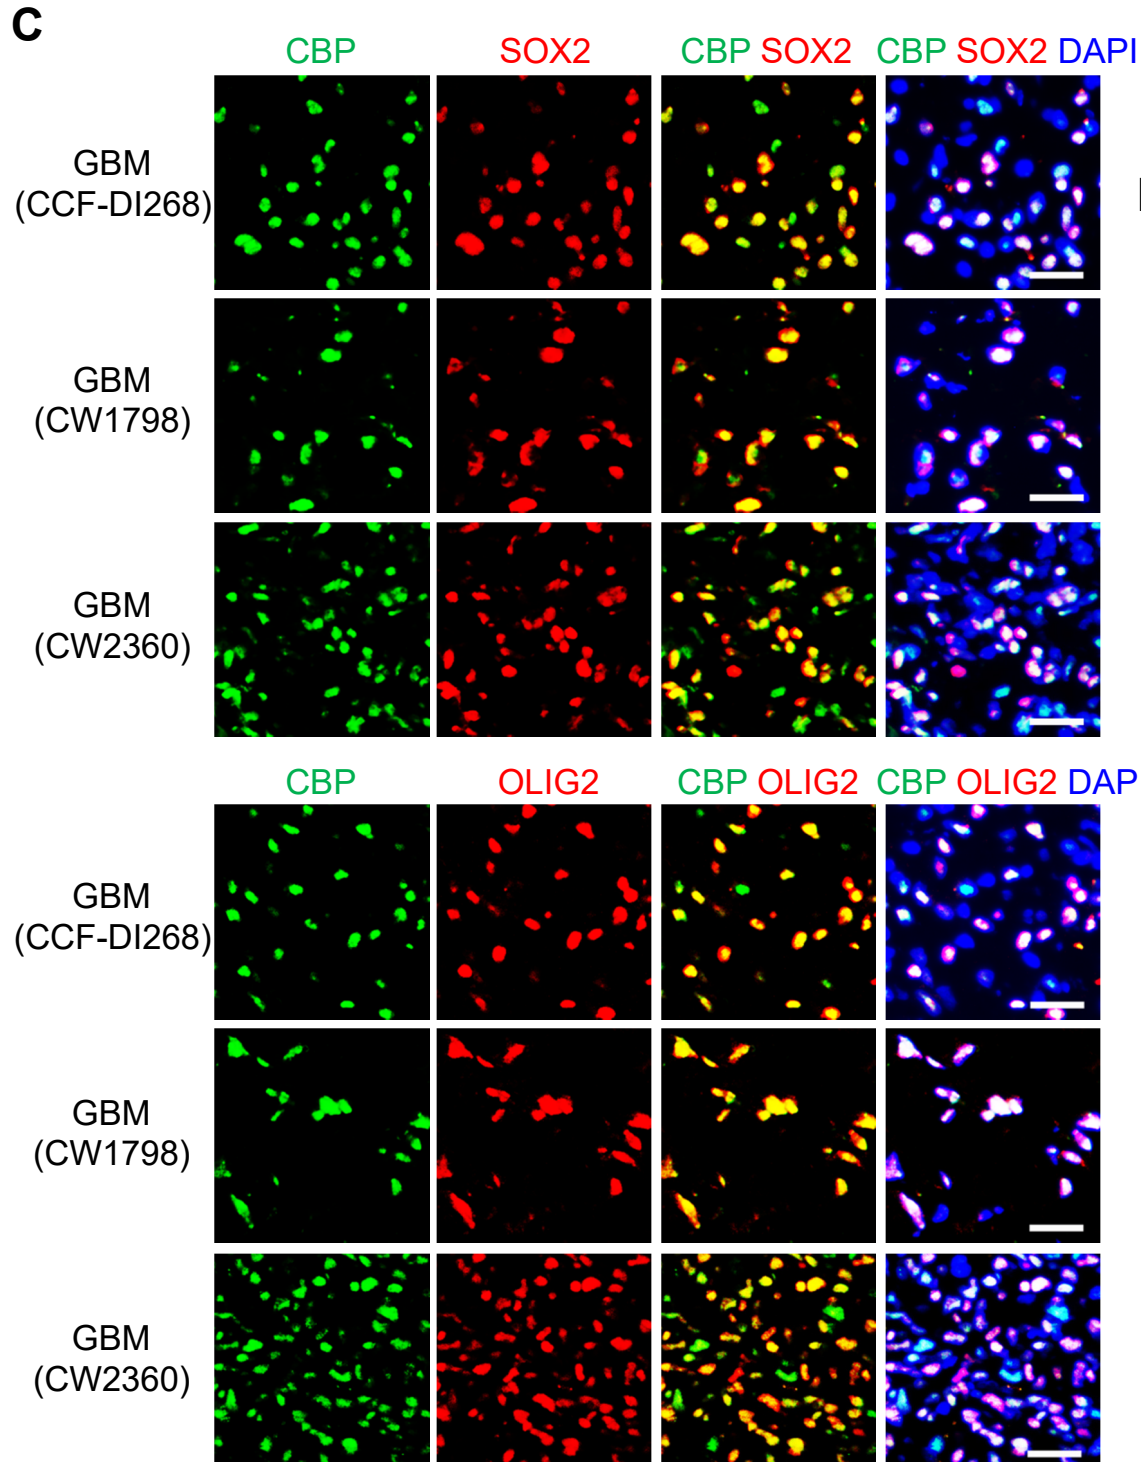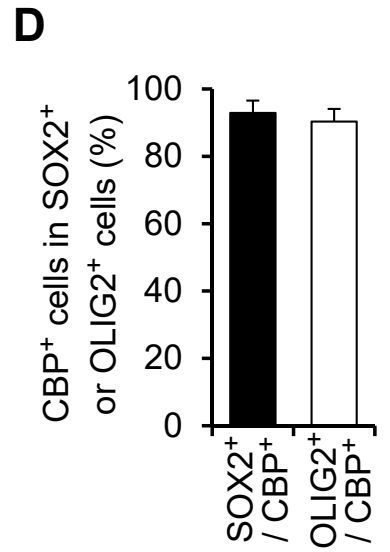

**Appendix Figure S5. CBP is preferentially expressed by GSCs.**

A. Immunoblot analysis of CBP expression in cell lysates of GSCs and matched NSTCs.

B. Immunoblot analysis of CBP expression in cell lysates of GSCs and NPCs.

C. Immunofluorescence of CBP (green) and the GSC marker SOX2 or OLIG2 (red) in human GBM specimens. CBP is preferentially expressed by GSCs in human GBMs. Scale bar, 25  $\mu$ m.

D. Quantification of (C) showing the fraction of CBP<sup>+</sup> cells in SOX2<sup>+</sup> or OLIG2<sup>+</sup> cells in human GBMs. More than 90% SOX2<sup>+</sup> or OLIG2<sup>+</sup> cells showed CBP staining. n=3 GBMs.

Data information: Data are shown as mean  $\pm$  SD.

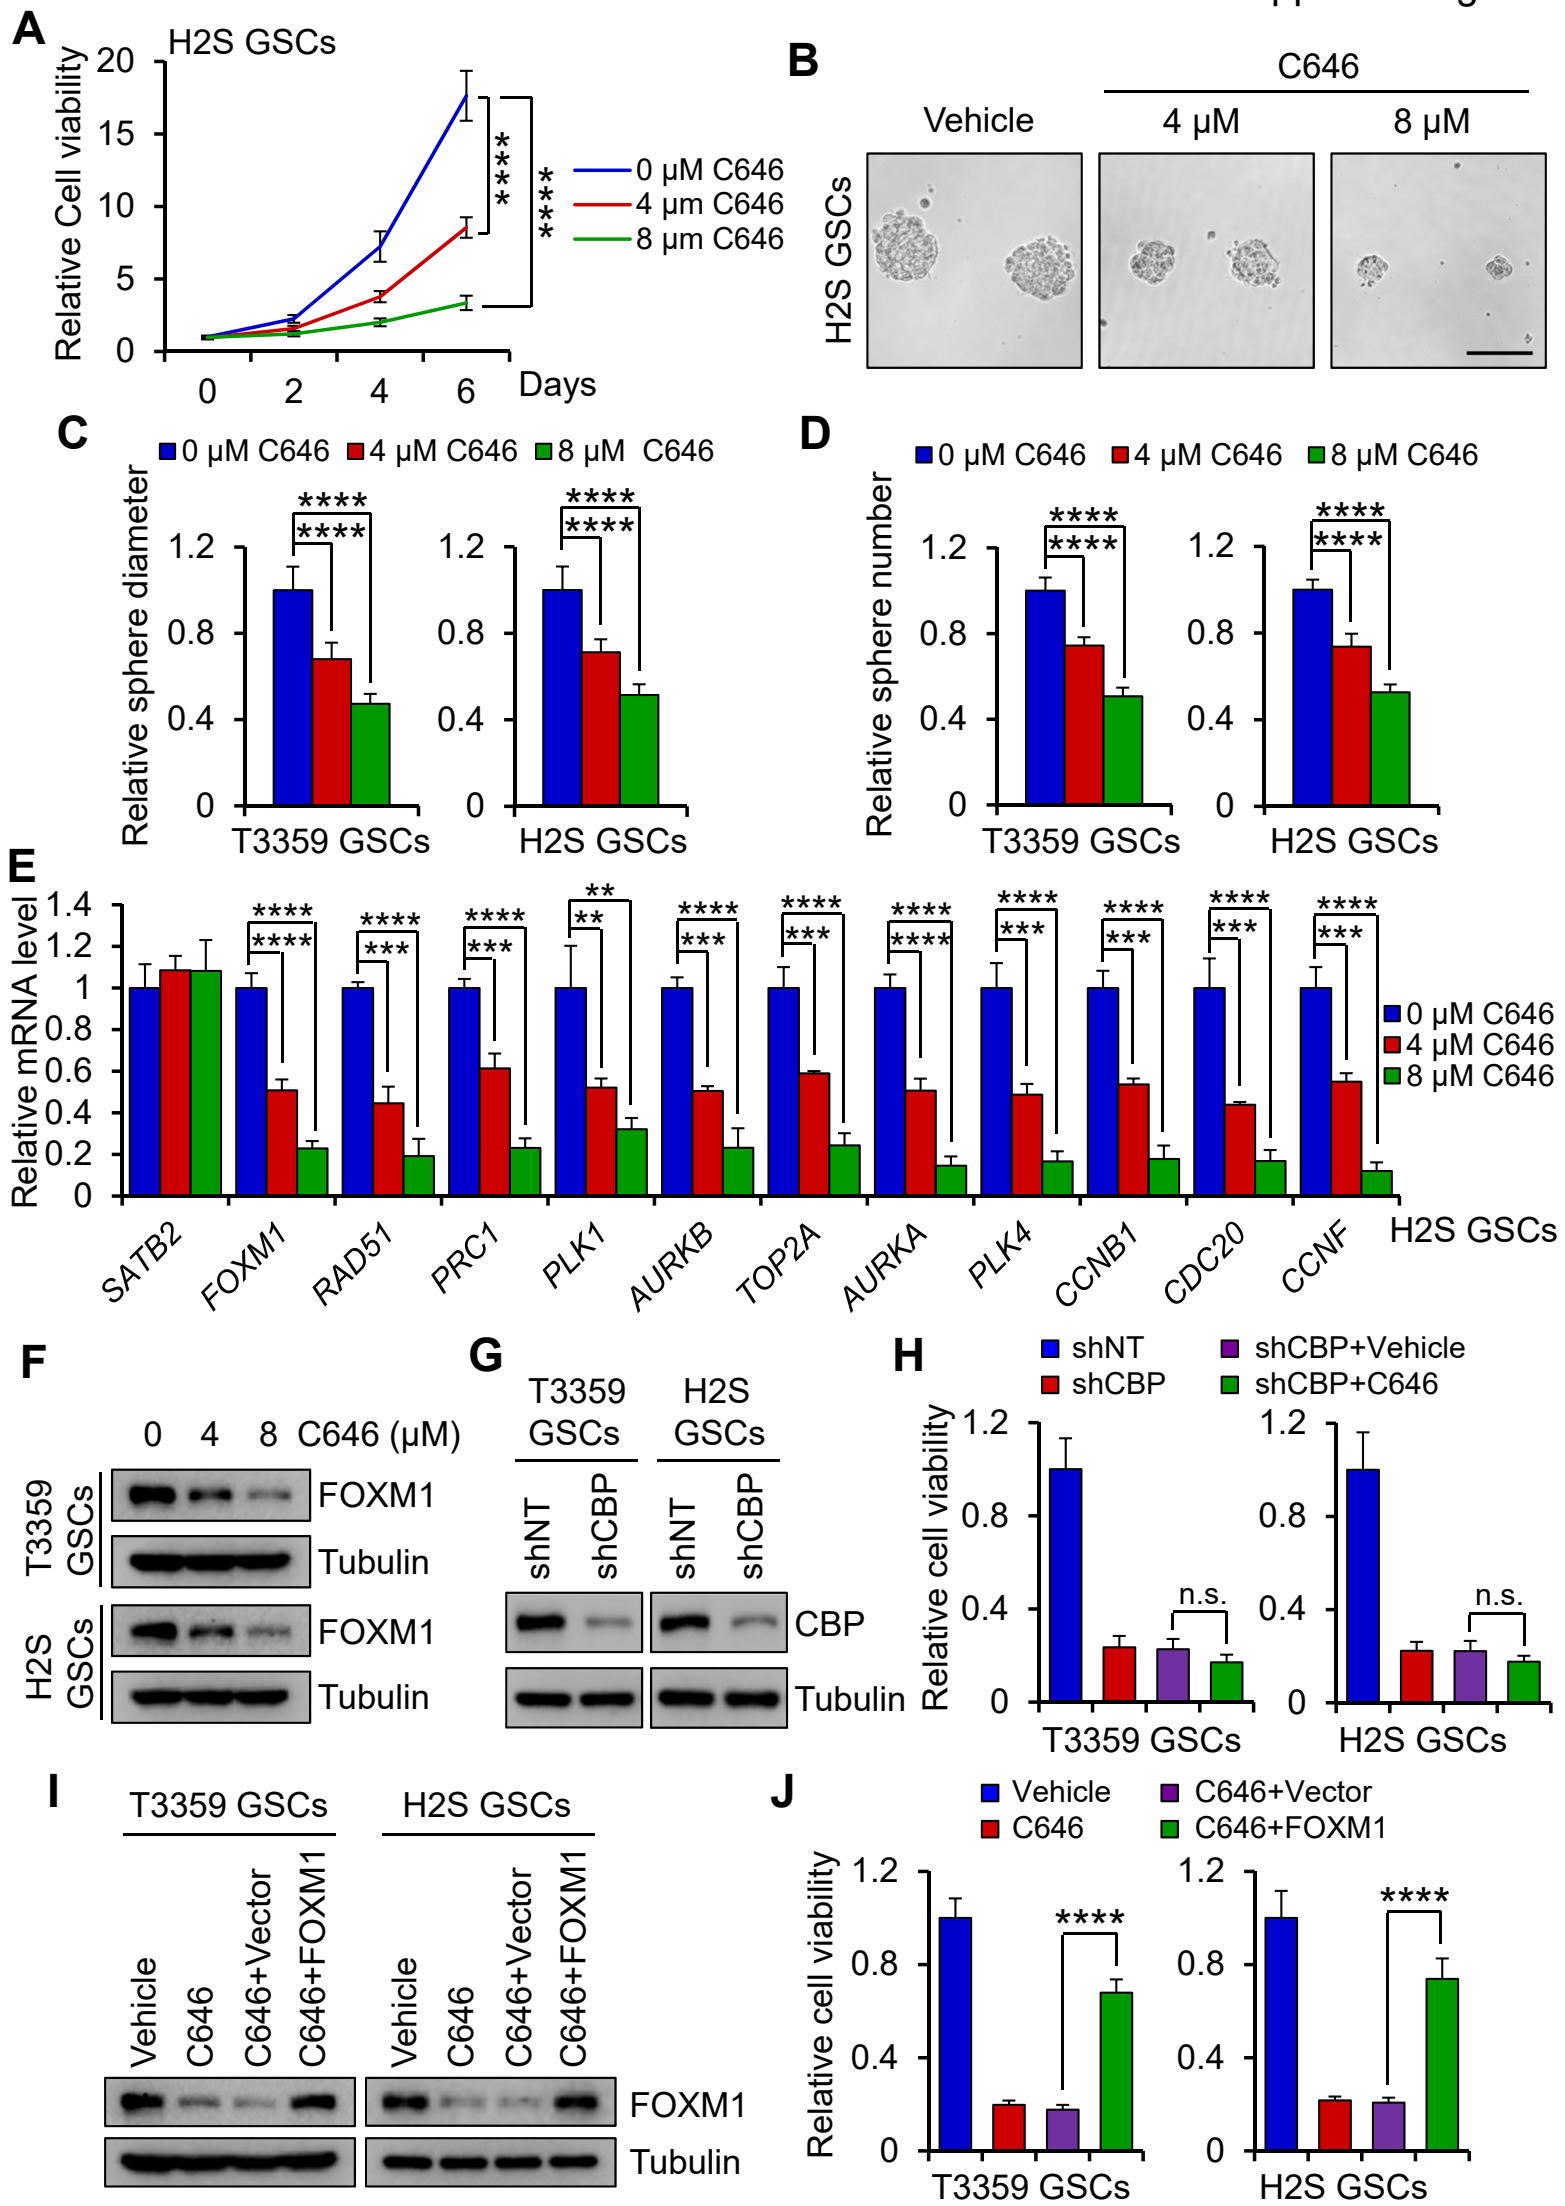

## Appendix Figure S6. CBP inhibition by C646 impaired GSC proliferation.

A. Cell viability of H2S GSCs treated with indicated doses of C646 or the vehicle control (n=5).

B. Tumorsphere images of H2S GSCs treated with indicated doses of C646 or the vehicle control for 6 days. Scale bar: 100  $\mu$ m.

C, D. Quantification of the diameter (C) or number (D) of tumorspheres from GSCs treated with indicated doses of C646 or the vehicle control for 6 days (C: n=9; D: n=4).

E. qPCR analysis of *SATB2*, *FOXM1* and *FOXM1* downstream targets in H2S GSCs treated with indicated doses of C646 or the vehicle control for 24 hours (n=3).

F. Immunoblot analysis of *FOXM1* expression in GSCs treated with indicated dose of C646 for 24 hours.

G. Immunoblot analysis of CBP expression in GSCs transduced with shCBP or shNT control for 48 hours.

H. Cell viability assay of GSCs transduced with shCBP or shNT for 48 hours and then treated with 8  $\mu$ M C646 or the vehicle control for 6 days (n=5).

I. Immunoblot analysis of *FOXM1* expression in GSCs transduced with *FOXM1* or vector control and treated with 8  $\mu$ M of C646 or the vehicle control for 48 hours.

J. Cell viability assay of GSCs transduced with *FOXM1* or vector control and treated with 8  $\mu$ M of C646 or the vehicle control for 6 days (n=5).

Data information: Data are represented as mean  $\pm$  SD. \*\* $p$ <0.01, \*\*\* $p$ <0.001, \*\*\*\* $p$ <0.0001, two way ANOVA analysis followed by Tukey's test (A) or one way ANOVA analysis followed by Tukey's test (C, D, E, H and J). Exact  $p$  values are reported in Appendix Table S3.

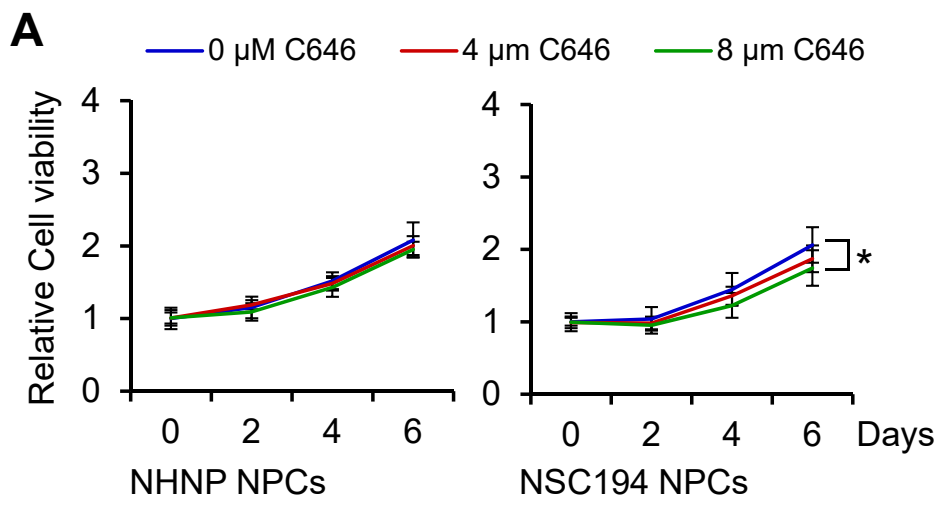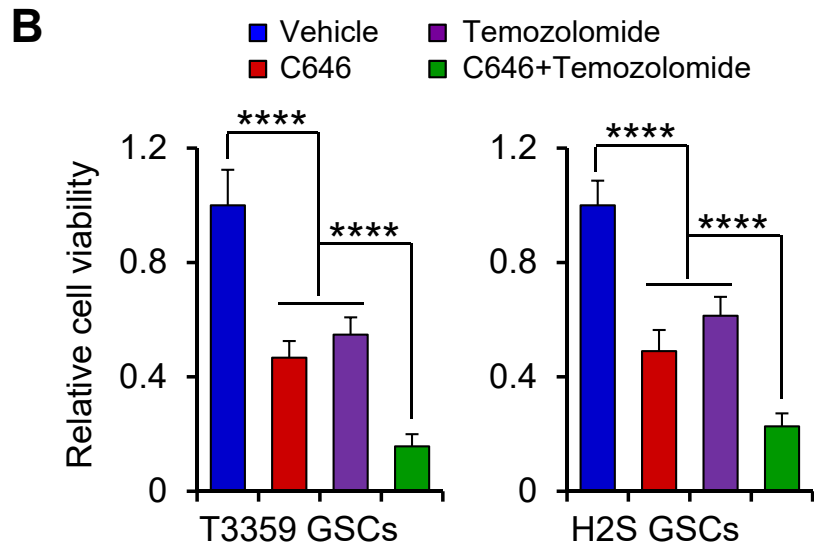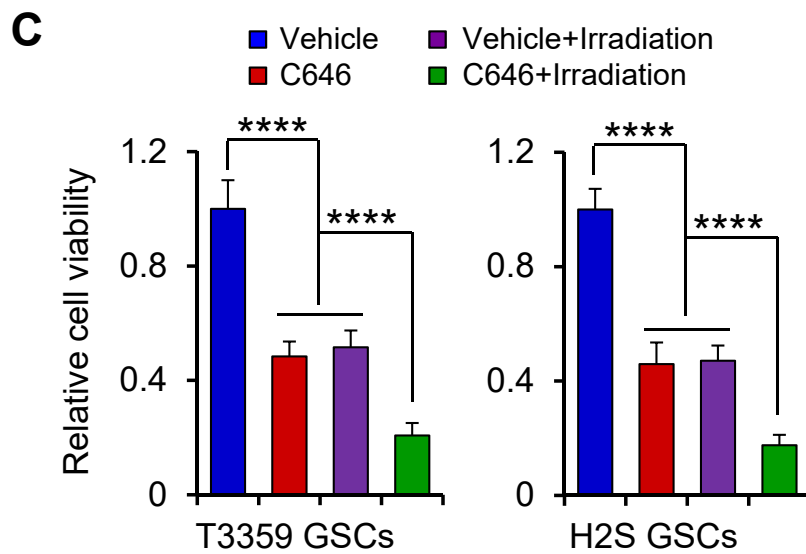

**Appendix Figure S7. The CBP inhibitor C646 had little effect on NPC proliferation but had synergistic effect with Temozolomide or irradiation to inhibit GSC proliferation.**

A. Cell viability of NPCs treated with indicated doses of C646 or the vehicle control (n=5).

B. Cell viability assay of GSCs treated with C646 (4  $\mu$ M) or Temozolomide (40  $\mu$ M) or in combination for 6 days (n=5).

C. Cell viability assay of GSCs treated with C646 (4  $\mu$ M) or irradiation (1 Gy) or in combination for 6 days (n=5).

Data information: Data are represented as mean  $\pm$  SD. \* $p$ <0.05, \*\*\*\* $p$ <0.0001, two way ANOVA analysis followed by Tukey's test (A) or one way ANOVA analysis followed by Tukey's test (B and C). Exact  $p$  values are reported in Appendix Table S3.

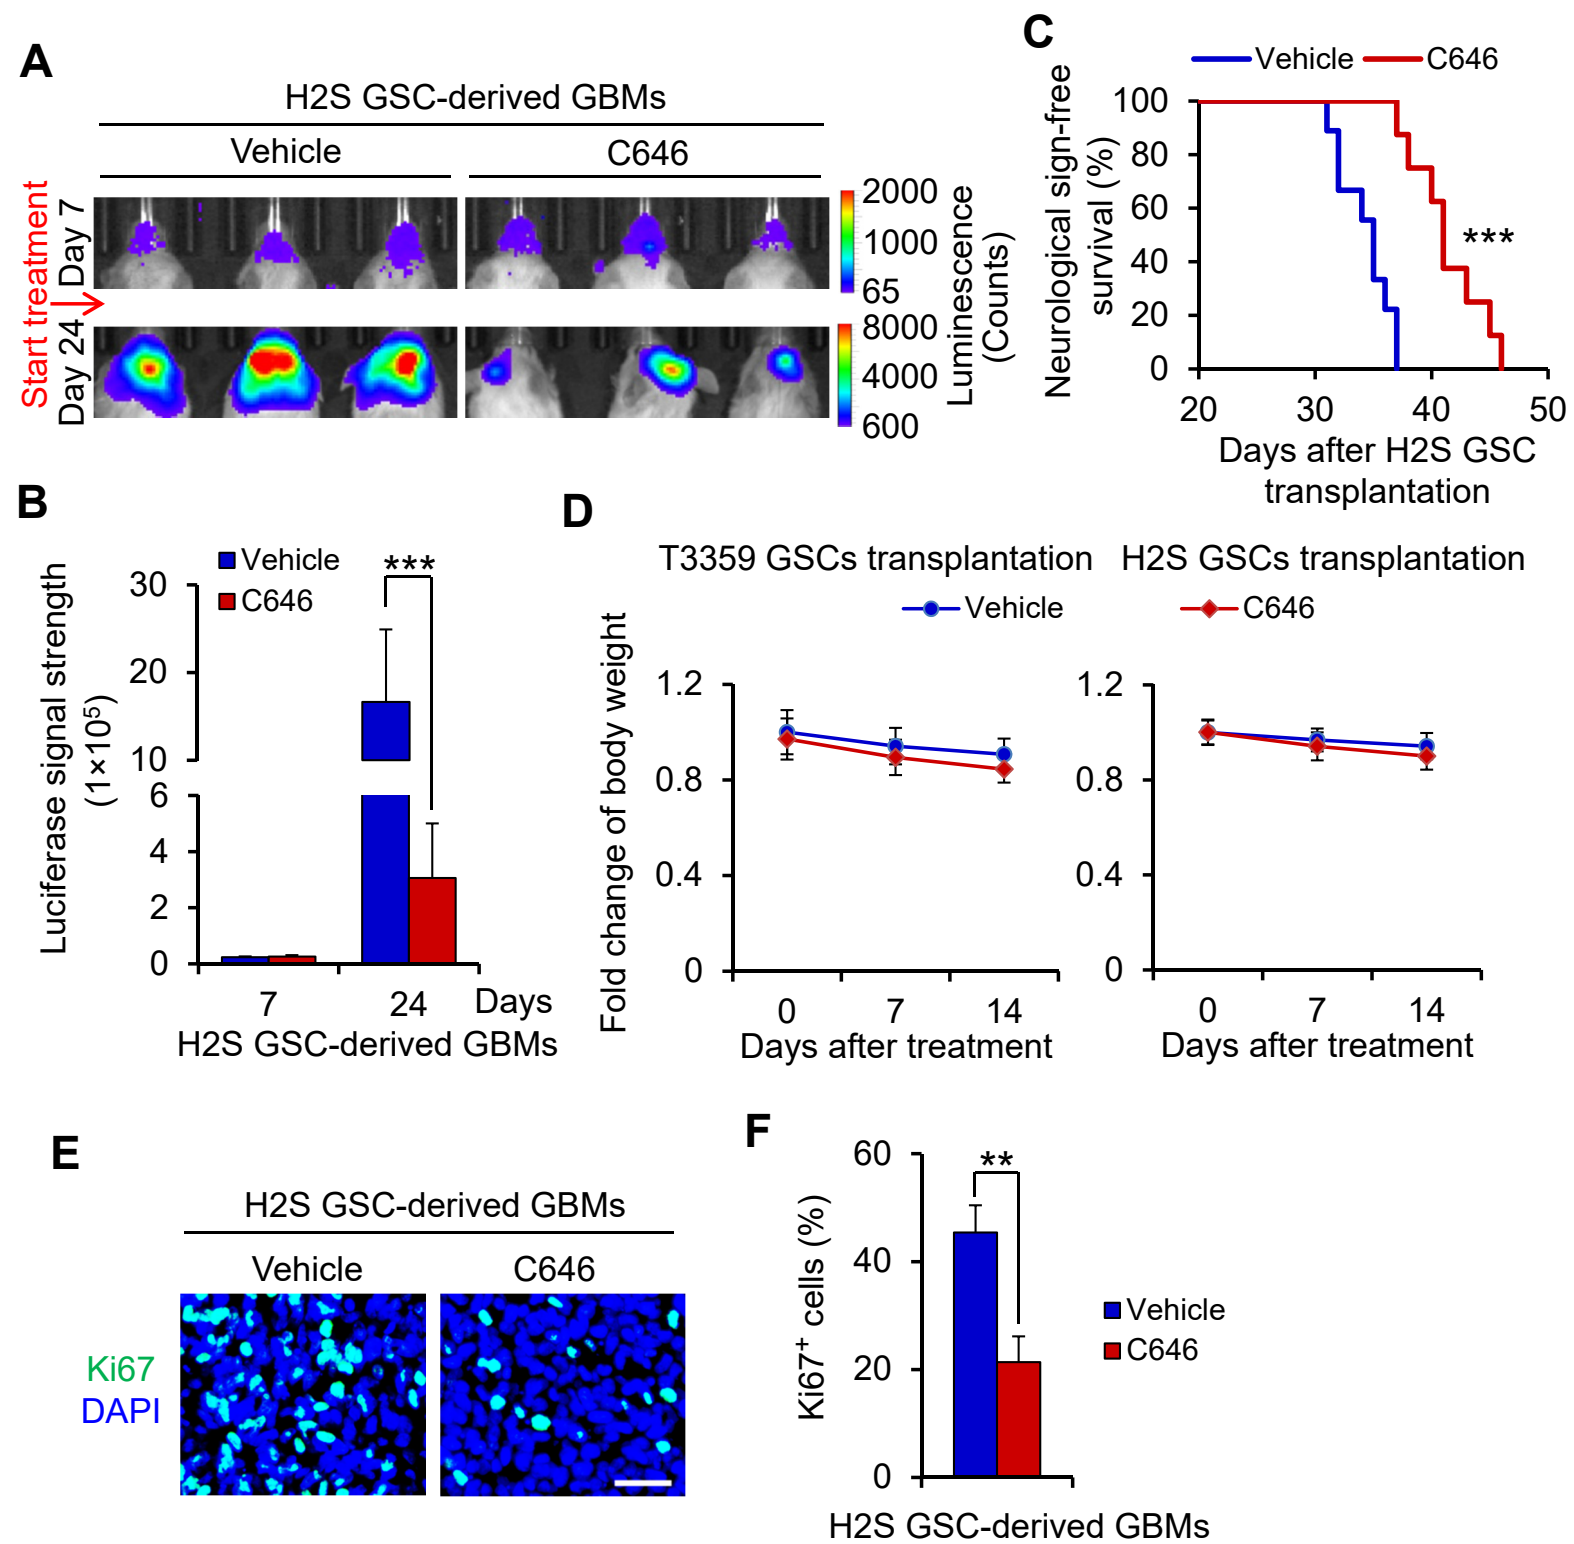



### **Appendix Figure S8. Targeting CBP by C646 impaired GSC-driven tumor growth.**

A. Bioluminescent imaging of tumor growth in mice bearing xenografts derived from the luciferase-labeled H2S GSCs treated with C646 or the vehicle control at indicated days after GSC transplantation (n=5 mice per group).

B. Quantification of tumor growth from (A) (n=5 mice per group).

C. Kaplan-Meier survival curves of mice bearing H2S GSC-derived xenografts treated with C646 or the vehicle control (Vehicle control: n=9 mice; C646 treatment: n=8 mice). Median survival: Vehicle control, 35 days; C646, 41 days.

D. Relative body weight of mice bearing GSC-derived tumor xenografts treated with C646 or the vehicle control at indicated days (Vehicle control: n=9 mice; C646: n=8 mice).

E. Immunofluorescence of Ki67 (Green) in H2S GSC-derived xenografts from mice treated with with C646 or the vehicle control (n=6 tumors per group). Scale bar: 40  $\mu$ m.

F. Quantification of Ki67 positive cells in H2S GSC-derived xenografts from mice treated with with C646 or the vehicle control (n=6 tumors per group).

Data information: Data are shown as mean  $\pm$  SD. \*\* $p < 0.01$ , \*\*\* $p < 0.001$ , two way ANOVA analysis followed by Sidak's test (B and D), log-rank test (C), or Mann-Whitney test (F). Exact  $p$  values are reported in Appendix Table S3.

**Appendix Table S1. *In vivo* limiting dilution assay for tumor formation of GSCs expressing shNT or shSATB2.** Tumor incidence, median survival time of mice and stem cell frequency after intracranial transplantation of 5000, 1000, 500 or 100 GSCs (T3359) expressing shNT, shSATB2-1, or shSATB2-2. \*\* $p < 0.01$  with Log-rank analysis of survival curves for the same number of GSCs expressing shSATB2 relative to shNT control. \*\*\* $p < 0.001$ , \*\*\*\* $p < 0.0001$  with ELDA analysis of stem cell frequencies between shNT and shSATB2 groups. Exact  $p$  values are reported in Appendix Table S3.

| shRNA     | GSC number      | 5000 | 1000 | 500  | 100   | Stem cell frequency |
|-----------|-----------------|------|------|------|-------|---------------------|
| shNT      | Incidence       | 5/5  | 5/5  | 5/5  | 5/5   | 1/1                 |
|           | Median survival | 29   | 36   | 41   | 57    |                     |
| shSATB2-1 | Incidence       | 5/5  | 5/5  | 3/5  | 0/5   | 1/475****           |
|           | Median survival | 49** | 62** | 73** | ---** |                     |
| shSATB2-2 | Incidence       | 5/5  | 5/5  | 3/5  | 1/5   | 1/400***            |
|           | Median survival | 47** | 58** | 67** | ---** |                     |

**Appendix Table S2. List of qPCR primers.**

| <b>Gene</b>     | <b>Forward/Reverse primer</b>                                  |
|-----------------|----------------------------------------------------------------|
| <i>18S rRNA</i> | 5'-AACCCGTTGAACCCATT-3'<br>5'-CCATCCAATCGGTAGTAGCG-3'          |
| <i>SATB2</i>    | 5'-GGAGAACGACAGCGAGGAA-3'<br>5'-CCGATGTATTGCTTTGCCTAGT-3'      |
| <i>FOXM1</i>    | 5'-ATACGTGGATTGAGGACCACT-3'<br>5'-TCCAATGTCAAGTAGCGGTTG-3'     |
| <i>CCNB2</i>    | 5'-TGCTCTGCAAATCGAGGACA-3'<br>5'-GCCAATCCACTAGGATGGCA-3'       |
| <i>RAD51</i>    | 5'-CAACCCATTTACGGTTAGAGC-3'<br>5'-TTCTTTGGCGCATAGGCAACA-3'     |
| <i>FANCI</i>    | 5'-CCACCTTTGGTCTATCAGCTTC-3'<br>5'-CAACATCCAATAGCTCGTCACC-3'   |
| <i>PRC1</i>     | 5'-AAGTGGAATTGATGCGAAAACAG-3'<br>5'-CCTCACGCCTAGAAGCCTTTG-3'   |
| <i>PLK1</i>     | 5'-AAAGAGATCCCGGAGGTCCTA-3'<br>5'-GGCTGCGGTGAATGGATATTTTC-3'   |
| <i>AURKB</i>    | 5'-CAGAAGAGCTGCACATTTGACG-3'<br>5'-CCTTGAGCCCTAAGAGCAGATTT-3'  |
| <i>TOP2A</i>    | 5'-TTAATGCTGCGGACAACAAACA-3'<br>5'-CGACCACCTGTCACTTTCTTTT-3'   |
| <i>UBE2C</i>    | 5'-CGTGTCTCCGAGTTCCTGT-3'<br>5'-GCTCCTGCTGTAGCCTTTTG-3'        |
| <i>AURKA</i>    | 5'-GAGGTCCAAAACGTGTTCTCG-3'<br>5'-ACAGGATGAGGTACACTGGTTG-3'    |
| <i>PLK4</i>     | 5'-AAGCTCGACACTTCATGCACC-3'<br>5'-GCATTTTCAGTTGAGTTGCCAG-3'    |
| <i>KIF20A</i>   | 5'-TTGAGGGTTAGGCCCTTGTTA-3'<br>5'-GTCCTTGGGTGCTTGTAAG-3'       |
| <i>CCNB1</i>    | 5'-AATAAGGCGAAGATCAACATGGC-3'<br>5'-TTTGTTACCAATGTCCCAAGAG-3'  |
| <i>CDC20</i>    | 5'-GACCACTCCTAGCAAACCTGG-3'<br>5'-GGGCGTCTGGCTGTTTTCA-3'       |
| <i>CCNF</i>     | 5'-GGAAAGCGACAGGAGGACAG-3'<br>5'-TGGCAGACGATCTCACTGGAA-3'      |
| <i>p21</i>      | 5'-TCCAGCGACCTTCCTCATCCAC-3'<br>5'-TCCATAGCCTCTACTGCCACCATC-3' |
| <i>p27</i>      | 5'-TAATTGGGGCTCCGGCTAACT-3'<br>5'-TGCAGGTCGCTTCCTTATTCC-3'     |

**Appendix Table S3. Summary of statistical tests and *p* values.**

| Figure number | Test used                                       | Comparison            | <i>p</i> value |
|---------------|-------------------------------------------------|-----------------------|----------------|
| Fig 1C        | Mann-Whitney test                               | H2S NSTCs vs. GSCs    | 0.0079         |
|               |                                                 | T3359 NSTCs vs. GSCs  | 0.0079         |
|               |                                                 | T3691 NSTCs vs. GSCs  | 0.0079         |
|               |                                                 | T4302 NSTCs vs. GSCs  | 0.0079         |
|               |                                                 | UCG163 NSTCs vs. GSCs | 0.0079         |
| Fig 1F        | One way ANOVA analysis followed by Tukey's test | NSC194 vs. T3359      | <0.0001        |
|               |                                                 | NSC194 vs. H2S        | <0.0001        |
|               |                                                 | NSC194 vs. UCG163     | <0.0001        |
|               |                                                 | NHNP vs. T3359        | <0.0001        |
|               |                                                 | NHNP vs. H2S          | <0.0001        |
|               |                                                 | NHNP vs. UCG163       | <0.0001        |
|               |                                                 | 16157 vs. T3359       | 0.0001         |
|               |                                                 | 16157 vs. H2S         | <0.0001        |
|               |                                                 | 16157 vs. UCG163      | <0.0001        |
| Fig 2B        | Two way ANOVA analysis followed by Tukey's test |                       | <0.0001        |
| Fig 2D        | One way ANOVA analysis followed by Tukey's test |                       | <0.0001        |
| Fig 2F        | One way ANOVA analysis followed by Tukey's test |                       | <0.0001        |
| Fig 2G        | One way ANOVA analysis followed by Tukey's test |                       | <0.0001        |
| Fig 2H        | ELDA analysis                                   | T3359 shNT vs. sh-1   | 1.29E-20       |
|               |                                                 | T3359 shNT vs. sh-2   | 7.38E-25       |
|               |                                                 | H2S shNT vs. sh-1     | 7.74E-14       |
|               |                                                 | H2S shNT vs. sh-2     | 1.47E-19       |
| Fig 3B        | Kruskal–Wallis test followed by Dunn's test     | shNT vs. sh-1         | 0.0175         |
|               |                                                 | shNT vs. sh-2         | 0.0327         |
| Fig 3C        | Log-rank test                                   | shNT vs. sh-1         | 0.001          |
|               |                                                 | shNT vs. sh-2         | 0.001          |
| Fig 3E        | One way ANOVA analysis followed by Tukey's test |                       | <0.0001        |
| Fig 3G        | One way ANOVA analysis followed by Tukey's test |                       | <0.0001        |
| Fig 3I        | One way ANOVA analysis followed by Tukey's test |                       | <0.0001        |
| Fig 4C        | One way ANOVA analysis followed by Tukey's test |                       | <0.0001        |
| Fig 4G        | One way ANOVA analysis followed by Tukey's test | CCNB2 shNT vs. sh-1   | 0.0011         |
|               |                                                 | shNT vs. sh-2         | 0.0008         |
|               |                                                 | RAD51 shNT vs. sh-1   | <0.0001        |
|               |                                                 | shNT vs. sh-2         | <0.0001        |
|               |                                                 | FANCI shNT vs. sh-1   | <0.0001        |
|               |                                                 | shNT vs. sh-2         | <0.0001        |
|               |                                                 | PRC1 shNT vs. sh-1    | <0.0001        |
|               |                                                 | shNT vs. sh-2         | <0.0001        |
|               |                                                 |                       |                |

|        |                                                 |                           |         |
|--------|-------------------------------------------------|---------------------------|---------|
|        |                                                 | PLK1 shNT vs. sh-1        | 0.0023  |
|        |                                                 | shNT vs. sh-2             | 0.0006  |
|        |                                                 | AURKB shNT vs. sh-1       | 0.0008  |
|        |                                                 | shNT vs. sh-2             | 0.0005  |
|        |                                                 | TOP2A shNT vs. sh-1       | <0.0001 |
|        |                                                 | shNT vs. sh-2             | <0.0001 |
|        |                                                 | UBE2C shNT vs. sh-1       | 0.0009  |
|        |                                                 | shNT vs. sh-2             | 0.0047  |
|        |                                                 | AURKA shNT vs. sh-1       | <0.0001 |
|        |                                                 | shNT vs. sh-2             | <0.0001 |
|        |                                                 | PLK4 shNT vs. sh-1        | 0.0003  |
|        |                                                 | shNT vs. sh-2             | 0.0002  |
|        |                                                 | KLF20A shNT vs. sh-1      | <0.0001 |
|        |                                                 | shNT vs. sh-2             | <0.0001 |
|        |                                                 | CCNB1 shNT vs. sh-1       | 0.0002  |
|        |                                                 | shNT vs. sh-2             | 0.0003  |
|        |                                                 | CDC20 shNT vs. sh-1       | 0.0001  |
|        |                                                 | shNT vs. sh-2             | 0.0002  |
|        |                                                 | CCNF shNT vs. sh-1        | <0.0001 |
|        |                                                 | shNT vs. sh-2             | <0.0001 |
|        |                                                 | p21 shNT vs. sh-1         | 0.0012  |
|        |                                                 | shNT vs. sh-2             | 0.0013  |
|        |                                                 | p27 shNT vs. sh-1         | 0.0403  |
|        |                                                 | shNT vs. sh-2             | 0.0185  |
| Fig 5B | Two way ANOVA analysis followed by Tukey's test |                           | <0.0001 |
| Fig 5C | One way ANOVA analysis followed by Tukey's test |                           | <0.0001 |
| Fig 5E | One way ANOVA analysis followed by Tukey's test | shNT vs. shNT+FOXM1       | 0.0014  |
|        |                                                 | shSATB2 vs. shSATB2+FOXM1 | <0.0001 |
| Fig 5F | Log-rank test                                   | 1 vs. 2                   | 0.0034  |
|        |                                                 | 1 vs. 3                   | 0.0003  |
|        |                                                 | 3 vs. 4                   | 0.0003  |
| Fig 5H | One way ANOVA analysis followed by Tukey's test | shNT vs. shNT+FOXM1       | 0.0819  |
|        |                                                 | shSATB2 vs. shSATB2+FOXM1 | 0.0033  |
| Fig 5J | One way ANOVA analysis followed by Tukey's test | shNT vs. shNT+FOXM1       | 0.0742  |
|        |                                                 | shSATB2 vs. shSATB2+FOXM1 | <0.0001 |
| Fig 6C | One way ANOVA analysis followed by Tukey's test | T3359 shNT vs. sh-1       | 0.0003  |
|        |                                                 | shNT vs. sh-2             | 0.0005  |
|        |                                                 | H2S shNT vs. sh-1         | 0.0134  |
|        |                                                 | shNT vs. sh-2             | 0.0123  |
| Fig 6E | One way ANOVA analysis followed by Tukey's test |                           | <0.0001 |
| Fig 6F | One way ANOVA analysis followed by Tukey's test | Ach3K18 shNT vs. sh-1     | 0.0021  |
|        |                                                 | shNT vs. sh-2             | 0.0026  |
|        |                                                 | Ach3K27 shNT vs. sh-1     | 0.0017  |
|        |                                                 | shNT vs. sh-2             | 0.0056  |
|        |                                                 | Ach4 shNT vs. sh-1        | 0.0011  |
|        |                                                 | shNT vs. sh-2             | 0.0024  |

|                  |                                                 |                                 |         |
|------------------|-------------------------------------------------|---------------------------------|---------|
| Fig 6G           | One way ANOVA analysis followed by Tukey's test | Control vs. shSATB2             | <0.0001 |
|                  |                                                 | Control vs. shCBP               | <0.0001 |
|                  |                                                 | shSATB2 vs. shSATB2+shCBP       | 0.0006  |
|                  |                                                 | shCBP vs. shSATB2+shCBP         | 0.0002  |
| Fig 7A           | Two way ANOVA analysis followed by Tukey's test |                                 | <0.0001 |
| Fig 7C           | One way ANOVA analysis followed by Tukey's test | FOXM1 shNT vs. sh-1             | 0.0012  |
|                  |                                                 | shNT vs. sh-2                   | <0.0001 |
|                  |                                                 | RAD51 shNT vs. sh-1             | 0.0009  |
|                  |                                                 | shNT vs. sh-2                   | <0.0001 |
|                  |                                                 | PRC1 shNT vs. sh-1              | 0.0004  |
|                  |                                                 | shNT vs. sh-2                   | <0.0001 |
|                  |                                                 | PLK1 shNT vs. sh-1              | 0.0344  |
|                  |                                                 | shNT vs. sh-2                   | 0.0072  |
|                  |                                                 | AURKB shNT vs. sh-1             | <0.0001 |
|                  |                                                 | shNT vs. sh-2                   | <0.0001 |
|                  |                                                 | TOP2A shNT vs. sh-1             | 0.0005  |
|                  |                                                 | shNT vs. sh-2                   | 0.0001  |
|                  |                                                 | AURKA shNT vs. sh-1             | 0.002   |
|                  |                                                 | shNT vs. sh-2                   | <0.0001 |
|                  |                                                 | PLK4 shNT vs. sh-1              | 0.0039  |
|                  |                                                 | shNT vs. sh-2                   | 0.0001  |
|                  |                                                 | CCNB1 shNT vs. sh-1             | 0.0206  |
|                  |                                                 | shNT vs. sh-2                   | 0.0047  |
|                  |                                                 | CDC20 shNT vs. sh-1             | <0.0001 |
|                  |                                                 | shNT vs. sh-2                   | <0.0001 |
|                  |                                                 | CCNF shNT vs. sh-1              | 0.0026  |
|                  |                                                 | shNT vs. sh-2                   | <0.0001 |
| Fig 7F           | Two way ANOVA analysis followed by Sidak's test |                                 | <0.0001 |
| Fig 7G           | Log-rank test                                   |                                 | <0.0001 |
| Fig 7I           | Mann-Whitney test                               |                                 | 0.0022  |
| Appendix Fig S3E | Kruskal–Wallis test followed by Dunn's test     | shNT vs. sh-1                   | 0.04    |
|                  |                                                 | shNT vs. sh-2                   | 0.014   |
| Appendix Fig S3F | Log-rank test                                   | shNT vs. sh-1                   | 0.0018  |
|                  |                                                 | shNT vs. sh-2                   | 0.0018  |
| Appendix Fig S3H | One way ANOVA analysis followed by Tukey's test |                                 | <0.0001 |
| Appendix Fig S3J | One way ANOVA analysis followed by Tukey's test |                                 | <0.0001 |
| Appendix Fig S3L | One way ANOVA analysis followed by Tukey's test |                                 | <0.0001 |
| Appendix Fig S4B | Two way ANOVA analysis followed by Tukey's test |                                 | <0.0001 |
| Appendix Fig S4D | One way ANOVA analysis followed by Tukey's test | CCNB2 shNT vs. shNT+FOXM1       | 0.0189  |
|                  |                                                 | CCNB2 shSATB2 vs. shSATB2+FOXM1 | 0.0752  |
|                  |                                                 | PRC1 shNT vs. shNT+FOXM1        | 0.0015  |
|                  |                                                 | PRC1 shSATB2 vs. shSATB2+FOXM1  | 0.0249  |

|                  |                                                 |                                 |         |
|------------------|-------------------------------------------------|---------------------------------|---------|
|                  |                                                 | AURKB shNT vs. shNT+FOXM1       | 0.0084  |
|                  |                                                 | AURKB shSATB2 vs. shSATB2+FOXM1 | 0.0942  |
|                  |                                                 | PLK1 shSATB2 vs. shSATB2+FOXM1  | 0.0497  |
|                  |                                                 | AURKA shNT vs. shNT+FOXM1       | 0.0062  |
|                  |                                                 | AURKA shSATB2 vs. shSATB2+FOXM1 | 0.0002  |
|                  |                                                 | CCNB1 shNT vs. shNT+FOXM1       | 0.0002  |
|                  |                                                 | CCNB1 shSATB2 vs. shSATB2+FOXM1 | <0.0001 |
|                  |                                                 | PLK4 shNT vs. shNT+FOXM1        | 0.0009  |
|                  |                                                 | PLK4 shSATB2 vs. shSATB2+FOXM1  | <0.0001 |
| Appendix Fig S4F | One way ANOVA analysis followed by Tukey's test |                                 | <0.0001 |
| Appendix Fig S6A | Two way ANOVA analysis followed by Tukey's test |                                 | <0.0001 |
| Appendix Fig S6C | One way ANOVA analysis followed by Tukey's test |                                 | <0.0001 |
| Appendix Fig S6D | One way ANOVA analysis followed by Tukey's test |                                 | <0.0001 |
| Appendix Fig S6E | One way ANOVA analysis followed by Tukey's test | FOXM1 shNT vs. sh-1             | <0.0001 |
|                  |                                                 | shNT vs. sh-2                   | <0.0001 |
|                  |                                                 | RAD51 shNT vs. sh-1             | 0.0002  |
|                  |                                                 | shNT vs. sh-2                   | <0.0001 |
|                  |                                                 | PRC1 shNT vs. sh-1              | 0.0003  |
|                  |                                                 | shNT vs. sh-2                   | <0.0001 |
|                  |                                                 | PLK1 shNT vs. sh-1              | 0.0076  |
|                  |                                                 | shNT vs. sh-2                   | 0.0013  |
|                  |                                                 | AURKB shNT vs. sh-1             | 0.0002  |
|                  |                                                 | shNT vs. sh-2                   | <0.0001 |
|                  |                                                 | TOP2A shNT vs. sh-1             | 0.0007  |
|                  |                                                 | shNT vs. sh-2                   | <0.0001 |
|                  |                                                 | AURKA shNT vs. sh-1             | <0.0001 |
|                  |                                                 | shNT vs. sh-2                   | <0.0001 |
|                  |                                                 | PLK4 shNT vs. sh-1              | 0.0006  |
|                  |                                                 | shNT vs. sh-2                   | <0.0001 |
|                  |                                                 | CCNB1 shNT vs. sh-1             | 0.0003  |
|                  |                                                 | shNT vs. sh-2                   | <0.0001 |
|                  |                                                 | CDC20 shNT vs. sh-1             | 0.0006  |
|                  |                                                 | shNT vs. sh-2                   | <0.0001 |
|                  |                                                 | CCNF shNT vs. sh-1              | 0.0004  |
|                  |                                                 | shNT vs. sh-2                   | <0.0001 |
| Appendix Fig S6J | One way ANOVA analysis followed by Tukey's test |                                 | <0.0001 |
| Appendix Fig S7A | Two way ANOVA analysis followed by Tukey's test |                                 | 0.0194  |
| Appendix Fig S7B | One way ANOVA analysis followed by Tukey's test |                                 | <0.0001 |
| Appendix Fig S7C | One way ANOVA analysis followed by Tukey's test |                                 | <0.0001 |
| Appendix Fig S8B | Two way ANOVA analysis followed by Sidak's test |                                 | 0.0002  |

|                   |                                     |                    |          |
|-------------------|-------------------------------------|--------------------|----------|
| Appendix Fig S8C  | Log-rank test                       |                    | 0.0001   |
| Appendix Fig S8F  | Mann-Whitney test                   |                    | 0.0022   |
| Appendix Table S1 | ELDA analysis (Stem cell frequency) | shNT vs. sh-1      | 8.41E-05 |
|                   |                                     | shNT vs. sh-2      | 2.04E-04 |
|                   | Log-rank test (Survival curve)      | 5000 shNT vs. sh-1 | 0.0018   |
|                   |                                     | shNT vs. sh-2      | 0.0018   |
|                   |                                     | 1000 shNT vs. sh-1 | 0.0018   |
|                   |                                     | shNT vs. sh-2      | 0.0018   |
|                   |                                     | 500 shNT vs. sh-1  | 0.0018   |
|                   |                                     | shNT vs. sh-2      | 0.0018   |
|                   |                                     | 100 shNT vs. sh-1  | 0.0018   |
|                   |                                     | shNT vs. sh-2      | 0.0064   |
